# Supplementary material
Source: publisher site journal article supplement (https://www.spandidos-publications.com/1866/downloadSupplementary)

Figure S1. Expression levels of MMP2 and MMP9 in NCI-H1299 cells transfected with si-RP11-284F21.9 were quantified using reverse transcription-quantitative PCR. Cells transfected with si-NC were used as NC. \* $P < 0.05$  vs. si-NC. NC, negative control; si, small interfering RNA.

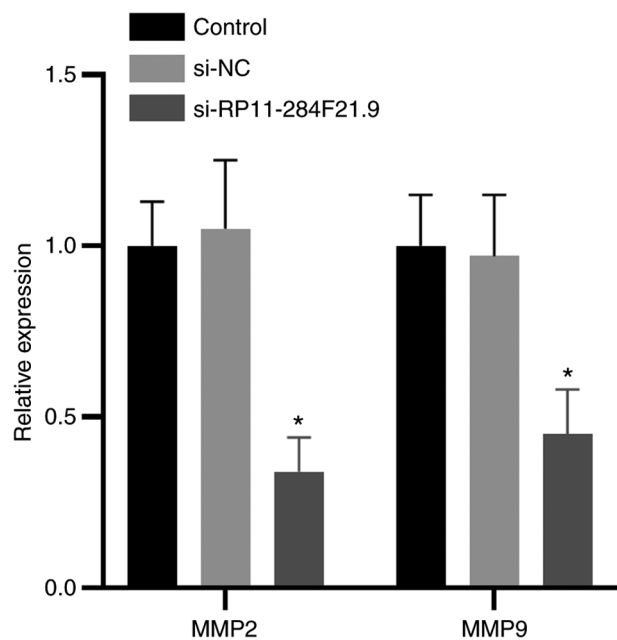

Figure S2. Potential downstream miRNA targets of RP11-284F21.9. Expression levels of the first five miRNAs in the output list of miRNAs predicted by lncBase were detected using reverse transcription-quantitative PCR in NCI-H1299 cells transfected with si-RP11-284F21.9. Cells transfected with si-NC were used as NC. \* $P < 0.05$ , \*\* $P < 0.01$  vs. si-NC. NC, negative control; miRNA/miR, microRNA; si, small interfering RNA.

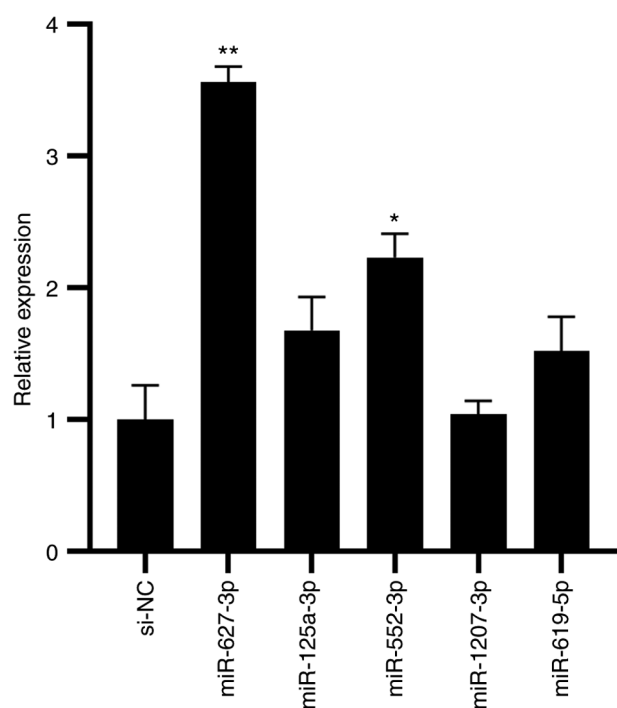

Figure S3. Expression levels of MMP2 and MMP9 in NCI-H1299 cells transfected with si-RP11-284F21.9 together with miR-627-3p inhibitor or miR-NC. Cells transfected with si-NC were used as NC. \*P<0.05 vs. si-NC. NC, negative control; miR, microRNA; si, small interfering RNA.

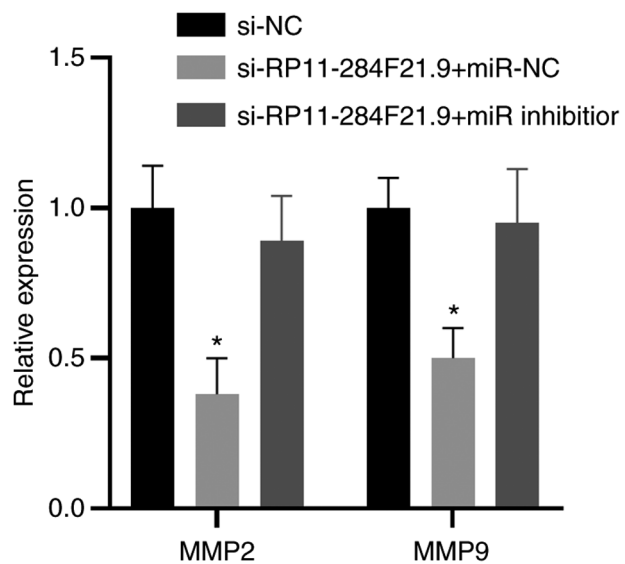

Figure S4. miR-627-3p expression in cells transfected with miR-627-3p mimic. Expression of miR-627-3p in 293 cells transfected with miR-NC or miR-627-3p mimic was detected using reverse transcription-quantitative PCR at 48 h after transfection. \*\*\*P<0.001 vs. miR-NC. NC, negative control; miR, microRNA.

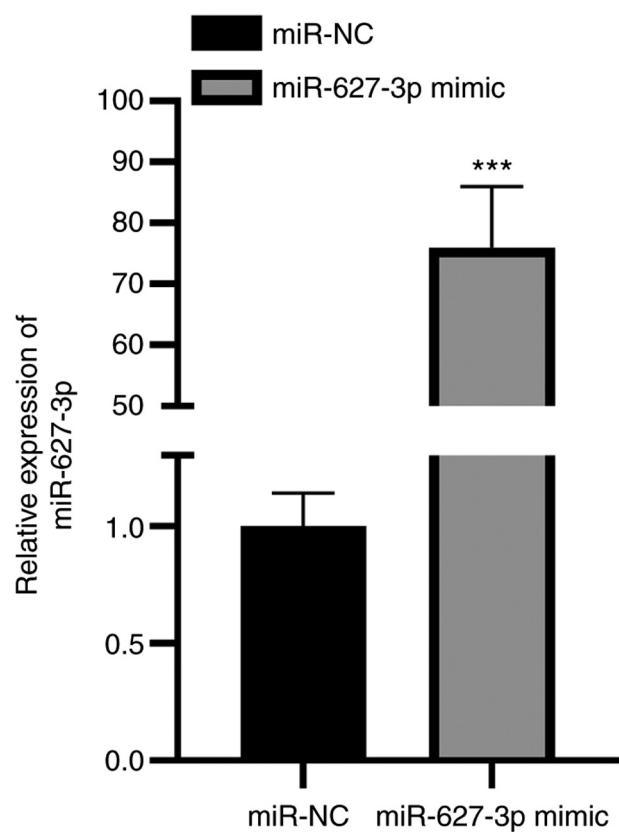

Supplement: Supplementary file 1 [file downloadSupplementary]
